# Supplementary material for: Personalized local SAR prediction for parallel transmit neuroimaging at 7T from a single T1‐weighted dataset
Source: PubMed Central journal article supplement (PMC9314883; doi:10.1002/mrm.29215), 2022-03-28

# Supporting Information Figure S1

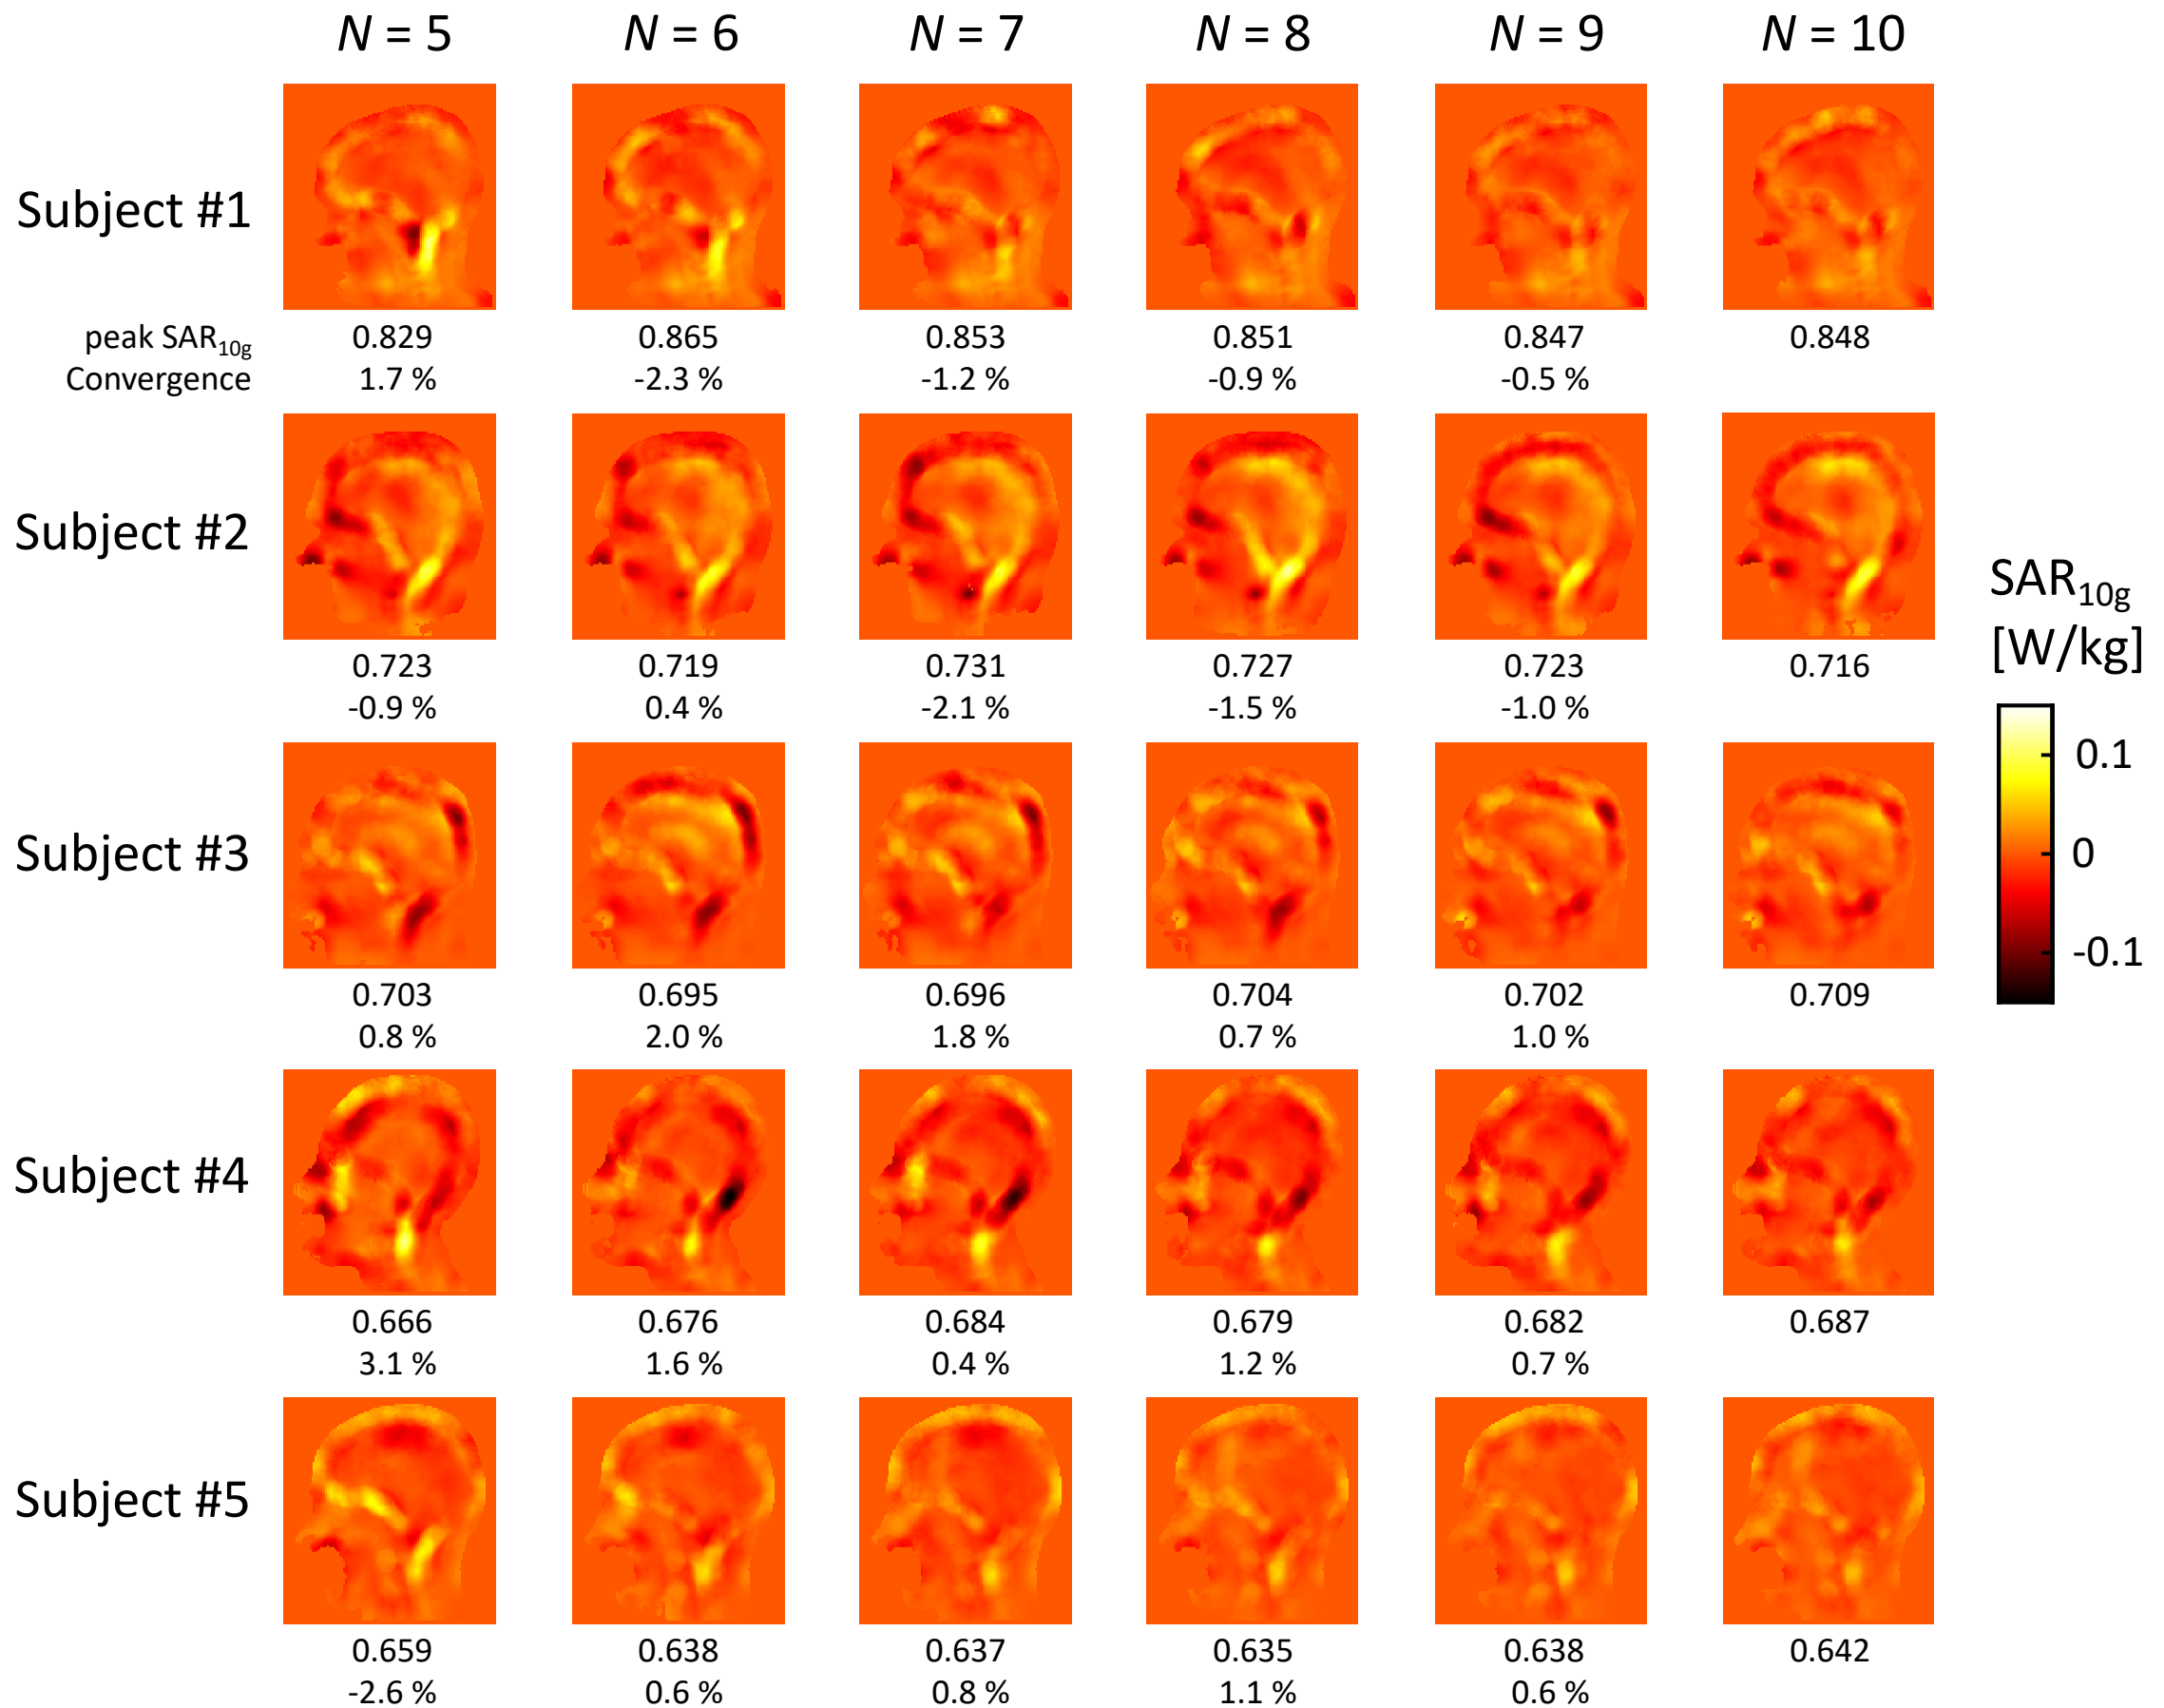

Supplement: MRM-88-464-s001.pdf [file MRM-88-464-s001.pdf]
